# Supplementary material
Source: HighWire-hosted journal article supplement (doi:10.1101/rna.049130.114)
Supplement: SuppLegends.docx [file SuppLegends.docx]

**Supplemental Information Figures**

**Table 1. Protein assignment in Csa, Cst, Cmr immunoprecipitated complexes by tandem mass spectrometry**. Percent sequence coverage and unique peptides of Cas and non-Cas proteins identified in Csa (Csa2, Cas3”), Cst (Cst2, Cas5t), and Cmr (Cmr2) immunoprecipitations are specified. The data were generated from either in-solution or in-gel trypsin-digested samples from 2-5 replicates. Proteins listed were subjected to pre-immune background subtraction and are specifically identified in immune pellets. Proteins identified in one replicate are indicated by asterisk.

**Figure S1. Cas protein composition of immunopurified complexes.** Silver-stained SDS-polyacrylamide gels of Csa (Cas3”) and Cst (Cas5t) immunopurified pellets with pre-immune (PI) or immune (I) antibodies as labeled. Cas proteins identified by tandem mass spectrometry are indicated based on expected molecular weight. The antigens are labeled in bold. Cas proteins identified by mass spectrometry that do not correlate to a visible band are marked with an asterisk. M is the protein standard in kilodaltons (kDa).

**Figures S2-S7.** **RNA-seq profiles of crRNAs associated with the Csa, Cst, and Cmr complexes and in total RNA**. The number of reads (in thousands) of crRNAs-associated with each complex (extracted from immune pellets of Cas3”, Csa2, Cas5t, Cst2, Cmr2) compared to crRNAs in total RNA (extracted from untreated S100 extract) that map to CRISPR locus 1 (S2), 2 (S3), 4 (S4), 6 (S5), 7 (S6), and 8 (S7) are shown. Reads mapping to both the sense (red, transcribed from upstream leader) and antisense (blue) strand are indicated. The black boxes at the top correspond to CRISPR repeats interspersed by guide sequences shown as black lines.
